# Supplementary material for: Nuclear pores enable sustained perinuclear calcium oscillations
Source: PubMed Central journal article supplement (PMC4957432; doi:10.1186/s12918-016-0289-9), 2016-07-22
Supplement: 12918_2016_289_MOESM4_ESM.pdf [file 12918_2016_289_MOESM4_ESM.pdf]

## Additional File 4: Critical surface for propagation failure

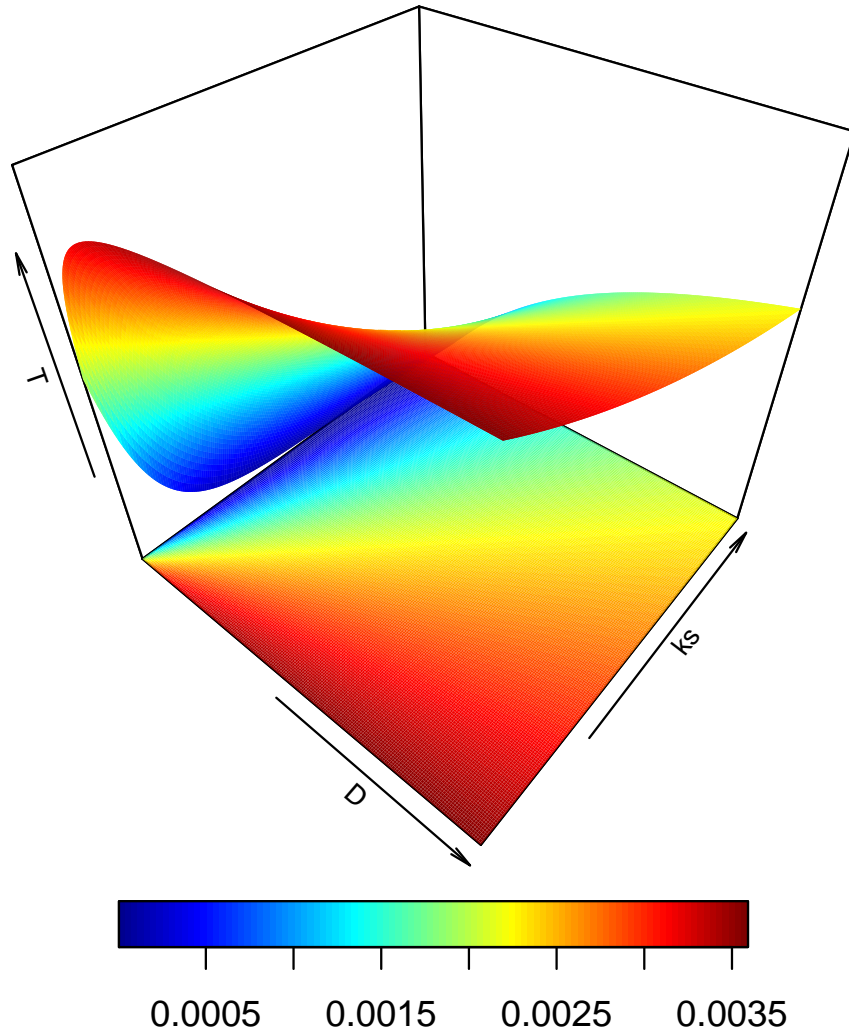

Figure 1: **Ca<sup>2+</sup> diffusion may fail if  $D$  is small or/and  $k_s$  is large.** For any  $D$  or  $k_s$ , if the ratio of the threshold  $c_{th}$  to the firing strength  $\sigma$ , defined as  $T$ , is above the depicted surface, then a travelling wave will not propagate across the entire surface. Conversely if  $T$  is below the surface, a single release event is guaranteed to initiate a propagating wave. Small diffusion constants and large pumping rates lead to propagation failure. In the Figure,  $D$  varies between 1 and 40  $\mu\text{m}^2/\text{s}$ , and  $k_s$  varies between 0.1 and 3  $\text{s}^{-1}$ . The average distance between channels is 5.65  $\mu\text{m}$ , corresponding to 24 approximately equidistant channels on a sphere of radius 8  $\mu\text{m}$ .
